# Supplementary material for: Photodynamic antimicrobial chemotherapy with the novel amino acid-porphyrin conjugate 4I: In vitro and in vivo studies
Source: PubMed Central journal article supplement (PMC5426629; doi:10.1371/journal.pone.0176529), 2017-05-11
Supplement: pone.0176529.s007.pdf [file pone.0176529.s007.pdf]

|                    |          |          |          |          |         |          |
|--------------------|----------|----------|----------|----------|---------|----------|
| PACT group         | 0.975    | 1.95     | 3.9      | 7.8      | 15.625  | 31.25    |
|                    | 98.84%   | 97.40%   | 39.70%   | 30.06%   | 23.40%  | 1.55%    |
|                    | 97.43%   | 86.27%   | 38.19%   | 29.71%   | 23.00%  | 2.07%    |
|                    | 99.14%   | 95.53%   | 40.12%   | 30.28%   | 24.39%  | 1.81%    |
| Mean               | 98.47%   | 93.07%   | 39.33%   | 30.02%   | 23.60%  | 1.81%    |
| standard deviation | 0.009098 | 0.059586 | 0.010153 | 0.002881 | 0.00717 | 0.002582 |
| 4l alone group     | 0.975    | 1.95     | 3.9      | 7.8      | 15.625  | 31.25    |
|                    | 97.35%   | 100.83%  | 93.36%   | 91.19%   | 87.41%  | 92.27%   |
|                    | 98.32%   | 89.23%   | 88.41%   | 86.94%   | 87.39%  | 87.47%   |
|                    | 104.13%  | 100.11%  | 92.58%   | 89.23%   | 89.27%  | 89.45%   |
| Mean               | 99.93%   | 96.72%   | 91.45%   | 89.12%   | 88.02%  | 89.73%   |
| standard deviation | 0.03665  | 0.06501  | 0.026628 | 0.021294 | 0.01081 | 0.024131 |
| Light alone group  | 93.70%   |          |          |          |         |          |
|                    | 99.73%   |          |          |          |         |          |
|                    | 96.56%   |          |          |          |         |          |
| Mean               | 96.66%   |          |          |          |         |          |
| standard deviation | 0.030149 |          |          |          |         |          |
| Control group      | 96.93%   |          |          |          |         |          |
|                    | 96.10%   |          |          |          |         |          |
|                    | 98.28%   |          |          |          |         |          |
| Mean               | 97.10%   |          |          |          |         |          |
| standard deviation | 0.011003 |          |          |          |         |          |

|       |        |
|-------|--------|
| 62.5  | 125    |
| 2.64% | 10.71% |
| 1.53% | 1.62%  |
| 7.24% | 6.37%  |

|          |          |
|----------|----------|
| 3.80%    | 6.23%    |
| 0.030264 | 0.045457 |

|        |        |
|--------|--------|
| 62.5   | 125    |
| 91.02% | 91.90% |
| 87.60% | 89.22% |
| 94.63% | 91.33% |

|          |          |
|----------|----------|
| 91.08%   | 90.82%   |
| 0.035186 | 0.014108 |
